# Supplementary material for: Iron(III) complexation behavior of benzene-centered tripodal mono-, di- and tritopic ligands carrying a repeating –Ahe–(HO)Apr– sequence [Ahe = 6-aminohexanoyl; (HO)Apr = 3-(N-hydroxy)aminopropanoyl]
Source: Royal Society of Chemistry journal article supplement (doi:10.1039/b005788f), 2001-01-01
Supplement: b005788f.doc [file b005788f.doc]

**Electronic supplementary information for B005788f**

Iron(III) complexation behavior of benzene-centered tripodal mono-, di- and tritopic ligands carrying a repeating –Ahe–(HO)Apr– sequence [Ahe = 6-aminohexanoyl; (HO)Apr = 3-(N-hydroxy)aminopropanoyl]

___________________________________________________________

**Akira Tsubouchi, Langtao Shen, Yukihiro Hara and Masayasu Akiyama***

*Department of Applied Chemistry, Tokyo University of Agriculture and Technology, Koganei, Tokyo 184-8588, Japan. E-mail: akiyama@cc.tuat.ac.jp*

___________________________________________________________

**Syntheses**

**Boc-Ahe-(BnO)Apr-OMe (6)**.A solution of isobutyl chloroformate (IBCF) ( 3.75 mL, 28.6 mmol) in THF (20 mL) was added dropwise to a solution of Boc-Ahe-OH (6.62 g, 28.6 mmol) and *N*-methylmorpholine (NMM) (3.15 mL, 28.6 mmol) in dry THF (100 mL) at 15 ˚C. After 15 min, a solution of H-(BnO)Apr-OMe (5.0 g, 23.8 mmol) in THF (30 mL) was added dropwise at the same temperature; the mixture was stirred for 3 h at 15 ˚C and then stored in a refrigerator at 20 ˚C for 48 h. The precipitates were filtered off and the filtrate was concentrated. The residue was dissolved in EtOAc (250 mL), washed with 5% NaHCO3, 5% citric acid and brine, and then dried (Na2SO4). The solvent was evaporated and the residue was separated by chromatography on silica gel with CHCl3-MeOH (10:1 V/V) to give compound **6** (7.9 g, 78%) as a colorless oil: HPLC *R*t 4.5 min. IR (neat):  C=O 1738 (ester), 1711 (urethane), 1666 (amide) cm1. 1H NMR (CDCl3)  1.241.63 (m, 6H, NHCH2[C*H*2]3CH2CO), 1.45 (s, 9H, But), 2.37 (t, *J* = 7.5 Hz, 2H, CH2CO of Ahe), 2.60 (t, *J* = 6.8 Hz, 2H, CH2CO of Apr), 3.08 (br q, 2H, NCH2 of Ahe), 3.64 (s, 3H, OCH3), 3.98 (t, *J* = 6.8 Hz, 2H, NCH2 of Apr), 4.65 (br s, 1H, BocN*H*), 4.82 (s, 2H, C*H*2Ph), 7.39 (s, 5H, aromatic H).

**Boc-Ahe-(BnO)Apr-OH (7)**. A solution of **6** (1.61g, 3.79 mmol) in MeOH (40 mL) was stirred with aqueous NaOH (1 M, 18.9 mL) at room temperature for 3h. The solution was acidified to pH 3 with 30% citric acid and evaporated to give a residue. The product was extracted from the residue with CHCl3 (50 mL 3) and dried (MgSO4). Evaporation of the solvent gave **7** as an oil (1.53 g, 98%): HPLC *R*t 3.4 min. IR (neat):  C=O 1710 (carboxylic acid), 1660 (amide) cm1.

**Boc-Ahe-(BnO)Apr-Ahe-(BnO)Apr-OMe (8).** Compound **6** (0.514 g, 1.22 mmol) was treated with 11.5 M HCl/dioxane (4.24 mL) for 3 h at 0 oC and evaporated under reduced pressure. The residue was dissolved in CH2Cl2 (30 mL) and neutralized with Et3N to pH 8 (on a wet paper) at 0oC. To this solution, compound **7** (0.515 g, 1.26 mmol), EDC.HCl (0.280 g, 1.46 mmol), and *N*-hydroxybenzotriazole (HOBt) (0.224 g, 1.46 mmol) were added successively at 0oC. The mixture was stirred for 3 h at 10 oC and 24 h at room temperature and concentrated to yield a residue. This was dissolved in EtOAc (200 mL) and washed with 5% NaHCO3, 5% citric acid, and brine, and then dried (Na2SO4). Evaporation of the solvent gave compound **8** as an oil (0.778 g, 90%): HPLC *R*t 4.6 min. IR (neat): C=O 1737 (ester), 1710 (urethane), 1660 (amide) cm1. 1H NMR (CDCl3) : 1.231.65 (m, 12H, 2  NHCH2[C*H*2]3CH2CO), 1.44 (s, 9H, But), 2.36 (t, *J* = 7.5 Hz, 4H, 2  CH2CO of Ahe), 2.49 (t, *J* = 6.8 Hz, 2H, CH2CO of Apr), 2.59 (t, *J* = 6.8 Hz, 2H, C*H*2CO2Me), 3.08 (br q, 2H, BocNHC*H*2), 3.20 (br q, 2H, NCH2 of Ahe), 3.63 (s, 3H, OCH3), 3.97 (t, *J* = 6.8 Hz, 4H, 2  NCH2 of Apr), 4.68 (br s, 1H, BocN*H*), 4.81 (s, 2H, C*H*2Ph), 4.83 (s, 2H, C*H*2Ph), 6.40 (br s, 1H, NH), 7.34 (s, 10H, aromatic H).

**Boc-Ahe-(BnO)Apr-Ahe-(BnO)Apr-Ahe-(BnO)Apr-OMe (9).** Compound **8** (0.314 g, 0.440 mmol) was treated with 11.5 M HCl/dioxane (1.53 mL) for 3 h at 0 oC and evaporated to give a residue, which was dissolved in CH2Cl2 (30 mL), and the solution was neutralized to pH 8 with NMM at 0 oC. To this solution, compound **7** (0.198 g, 0.484 mmol), EDC.HCl (0.101 g, 0.528 mmol) and HOBt (0.0808 g, 0.528 mmol) were added at 0oC. After stirring for 3 h at 10 oC and 24 h at room temperature, the mixture was evaporated to give a residue. The residue was dissolved in EtOAc (150 mL) and washed with 5% NaHCO3, 5% citric acid and brine, and then dried (Na2SO4). Evaporation of the solvent gave a crude product, which was purified by chromatography on silica gel (CHCl3:CH3OH=10:1 v/v) to yield compound **9** (0.290 g, 66%) as an amorphous solid: HPLC *R*t 4.6 min. IR (neat):  C=O 1737 (ester), 1708 (urethane), 1658 (amide) cm1. 1H NMR (CDCl3)  1.221.65 (m, 18H, 3  NHCH2[C*H*2]3CH2CO), 1.43 (s, 9H, But), 2.35 (t, *J* = 7.1 Hz, 6H, 3  CH2CO of Ahe), 2.48 (t, *J* = 6.8 Hz, 4H, 2  CH2CO of Apr), 2.58 (t, *J* = 6.8 Hz, 2H, C*H*2CO2Me), 3.08 (br q, 2H, BocNHC*H*2), 3.14 (br q, 4H, 2  NCH2 of Ahe), 3.62 (s, 3H, OCH3), 3.96 (br t, 6H, 3  NCH2 of Apr), 4.75 (s, 1H, BocN*H*), 4.81 and 4.82 (s, 6H, 3  C*H*2Ph), 6.47 (br s, 2H, 2  NH), 7.38 (s, 15 H, aromatic H).

**General procedure for preparation of protected tripodal ligands (13  15) with 1, 3, 5-benzenetricarbonyl trichloride.** The Boc group (compound **6**, **8** and **9**) was removed with 11.5 M HCl/dioxane for 3 h at 0 oC. The reaction mixture was concentrated under reduced pressure to give a residue, which was dissolved in dry CH2Cl2 and neutralized to pH 8 (on a wet paper) with Et3N at 0 oC. 1, 3, 5-Benzenetricarbonyl trichloride (0.33 equiv to **6**, **8** or **9**) and Et3N (a 1-equiv amount to **6**, **8** or **9**) were mixed at 0 oC, the mixture being stirred for 3 h at 0 oC and 24 h at room temperature. After volatile components were evaporated, the residue was dissolved in EtOAc, washed with 5% NaHCO3, 5% citric acid, H2O and brine, and dried (Na2SO4). The solvent was evaporated and the crude product was purified by column chromatography on silica gel with CHCl3-MeOH (10:1 v/v).

**C6H3[CO-Ahe-(BnO)Apr-OMe]3 (13)** (0.329 g, 70%) wasobtained from **6** (0.535 g, 1.26 mmol) as an amorphous solid; HPLC *R*t 4.3 min. IR (KBr):  C=O 1738 (ester), 1660 (amide) cm1. 1H NMR (CDCl3)  1.37 (m, 6H, 3  NHCH2CH2C*H*2CH2CH2CO), 1.61 (m, 12H, 3  NHCH2C*H*2CH2C*H*2CH2CO), 2.39 (t, *J* = 7.5 Hz, 6H, 3  CH2CO of Ahe), 2.56 (t, *J* = 6.5 Hz, 6H, 3  CH2CO of Apr), 3.46 (q, *J* = 6.5 Hz, 6H, 3  NCH2 of Ahe), 3.60 (s, 9H, 3  OCH3), 3.96 (br t, 6H, 3  NCH2 of Apr), 4.80 (s, 6H, 3  C*H*2Ph), 6.95 (br s, 3H, 3  NH), 7.35 (s, 15H, 3  CH2*Ph*), 8.40 (s, 3H, C6H3).

**C6H3[CO-Ahe-(BnO)Apr-Ahe-(BnO)Apr-OMe]3 (14)** (0.156 g, 53%) was obtained from **8** (0.322 g, 0.452 mmol) as an amorphous solid; HPLC *R*t 4.5 min. IR (KBr):  C=O 1739 (ester), 1658 (amide) cm1. 1H NMR (CDCl3)  1.221.65 (m, 36H, 6  NHCH2[C*H*2]3CH2CO), 2.33 (t, *J* = 7.3 Hz, 6H, 3  CH2CO of Ahe), 2.37 (t, *J* = 7.0 Hz, 6H, 3  CH2CO of Ahe), 2.45 (t, *J* = 6.6 Hz, 6H, 3  C*H*2CO of Apr), 2.56 (t, *J* = 6.8 Hz, 6H, 3  C*H*2CO2Me), 3.14 (q, *J* = 6.5 Hz, 6H, 3  NCH2 of Ahe), 3.43 (br q, 6H, 3  NCH2 of CO-Ahe), 3.60 (s, 9H, 3  OCH3), 3.93 (m, 12H, 6  NCH2 of Apr), 4.79 (s, 6H, 3  C*H*2Ph), 4.80 (s, 6H, 3  C*H*2Ph), 6.60 (br s, 3H, 3  NH), 7.277.34 (m, 30H, 6  CH2*Ph*), 7.38 (br t, 3H, 3  C6H3-CON*H*-), 8.40 (s, 3H, C6H3).

**C6H3[CO-Ahe-(BnO)Apr-Ahe-(BnO)Apr-Ahe-(BnO)Apr-OMe]3 (15)** (0.0768 g, 31%) was obtained from **9** (0.272 g, 0.271 mmol) as an amorphous solid: HPLC *R*t 5.8 min. IR (KBr):  C=O 1738 (ester), 1657 (amide) cm1. 1H NMR (CDCl3)  1.051.60 (m, 54H, 9  NHCH2[C*H*2]3CH2CO), 2.202.31 (m, 18H, 9  CH2CO of Ahe), 2.39 (t, *J* = 6.7 Hz, 12H, 6  CH2CO of Apr), 2.49 (t, *J* = 6.7 Hz, 6H, 3  C*H*2CO2Me), 3.02 (q, *J* = 6.1 Hz, 6H, 3  NCH2 of Ahe), 3.09 (q, *J* = 6.1 Hz, 6H, 3  NCH2 of Ahe), 3.34 (br q, 6H, 3  NCH2 of CO-Ahe), 3.88 (m, 18H, 9  NCH2 of Apr), 4.71 and 4.43 (s, 18H, 9  C*H*2Ph), 6.56 (br s, 3H, 3  NH), 6.68 (s, 3H, 3  NH), 7.28 (m, 45H, 9  CH2*Ph*), 7.63 (br s, 3H, 3  C6H3-CON*H* ), 8.35 (s, 3H, C6H3).

**General procedure for hydrolysis of methyl esters of ligands 13  15 to produce 1618.** An aqueous NaOH solution (1 M, 6 equiv) was added to a solution of a compound (one from **13**  **15**) in MeOH, and the mixture was stirred for 6 h at room temperature. After acidification to pH 3 with aqueous HCl (2 M), the reaction mixture was evaporated to give a residue, which was extracted with CHCl3 (3 times) and dried (Na2SO4). Evaporation of the solvent gave the desired carboxylic acid derivatives as amorphous solids.

**C6H3[CO-Ahe-(BnO)Apr-OH]3 (16)** (0.112 g, 80%) from **13** (0.137 g, 0.131 mmol) as an amorphous solid: HPLC *R*t 2.7 min. IR (KBr):  C=O 1727 (carboxylic acid), 1658 (amide) cm1. 1H NMR (d6-DMSO)  1.271.31 (m, 6H, 3  NHCH2CH2C*H*2CH2CH2CO), 1.471.54 (m, 12H, 3  NHCH2C*H*2CH2C*H*2CH2CO), 2.31 (t, *J* = 7.3 Hz, 6H, 3  CH2CO of Ahe), 2.41 (t, *J* = 7.0 Hz, 6H, 3  CH2CO of Apr), 3.25 (q, *J* = 6.1 Hz, 6H, 3  NCH2 of Ahe), 3.82 (t, *J* = 7.0 Hz, 6H, 3  NCH2 of Apr), 4.83 (s, 6H, 3  C*H*2Ph), 7.327.41 (m, 15H, 3  CH2*Ph*), 8.41 (s, 3H, C6H3), 8.70 (br t, 3H, 3  C6H3-CON*H* ).

**C6H3[CO-Ahe-(BnO)Apr-Ahe-(BnO)Apr-OH]3 (17)** (0.118 g, 93%) from **14** (0.137 g, 0.0626 mmol) as an amorphous solid: HPLC *R*t 2.9 min. IR (KBr)  C=O 1725 (carboxylic acid), 1653 (amide ) cm1. 1H NMR (d6-DMSO)  1.18-1.53 (m, 36H, 6  NHCH2[C*H*2]3CH2CO), 2.272.36 (m, 18H, 6  CH2CO of Ahe and 3  CH2CO of Apr), 2.45 (t, *J* = 6.8 Hz, 6H, 3  C*H*2CO2H), 2.99 (q, *J* = 6.5 Hz, 6H, 3  NCH2 of Ahe), 3.27 (q, *J* = 6.5 Hz, 6H, 3  NCH2 of CO-Ahe), 3.83 (t, *J* = 6.5 Hz, 12H, 6  NCH2 of Apr), 4.82 (s, 6H, 3  C*H*2Ph), 4.84 (s, 6H, 3  C*H*2Ph), 7.347.41 (m, 30H, 6  CH2*Ph*), 7.86 (t, 3H, 3  NH), 8.25 (s, 3H, C6H3), 8.62 (t, 3H, 3  C6H3-CON*H* ).

**C6H3[CO-Ahe-(BnO)Apr-Ahe-(BnO)Apr-Ahe-(BnO)Apr-OH]3 (18)** (0.0515 g, 90%) from **15** (0.0580 g, 0.0202 mmol) as an amorphous solid: HPLC *R*t 3.2 min. IR (KBr): C=O 1723 (carboxylic acid), 1641 (amide) cm1. 1H NMR (d6-DMSO)  1.201.52 (m, 54H, 9  NHCH2[C*H*2]3CH2CO), 2.272.35 (m, 30H, 9  CH2CO of Ahe and 6  CH2CO of Apr), 2.44 (t, *J* = 7.0 Hz, 6H, 3  C*H*2CO2H), 2.99 (q, *J* = 6.5 Hz, 12H, 6  NCH2 of Ahe), 3.26 (q, *J* = 5.8 Hz, 6H, 3  NCH2 of CO-Ahe), 3.81 (m, 18H, 9  NCH2 of Apr), 4.81 and 4.84 (s, 18H, 9  C*H*2Ph), 7.327.41 (m, 45H, 9  CH2*Ph*), 7.83 (br t, 6H, 6  NH), 8.38 (s, 3H, C6H3), 8.64 (br t, 3H, 3  C6H3-CON*H* ).
